# Supplementary material for: Selective AKT Inhibition by MK-2206 Represses Colorectal Cancer-Initiating Stem Cells
Source: Ann Surg Oncol. 2016 Apr 8;23:2849–57. doi: 10.1245/s10434-016-5218-z (PMC4972858; doi:10.1245/s10434-016-5218-z)
Supplement: Supplementary file 1 — Supplementary material 1 (XLSX 18 kb) [file 10434_2016_5218_MOESM1_ESM.xlsx]

## Sheet: Upregulated
Probe Id	p-Value	log(fold_change)	Gene_Symbol
2975655	0.0224957	1.00091	FAM54A
2601287	0.00497019	1.01827	AP1S3
3897505	0.0381618	1.02347	JAG1
2469157	0.0410084	1.03602	GRHL1
3525655	0.00861163	1.03732	LINC00346
2832459	0.039495	1.04817	PCDHB14
3875642	0.0146855	1.05148	PLCB1
2778856	0.00202927	1.05381	TSPAN5
3409330	0.0429941	1.05768	MRPS35
3645359	0.0190193	1.05795	ZG16B
4012299	0.0124619	1.07086	PHKA1 PHKA1-AS1
3468743	0.00457427	1.07285	NT5DC3
3736232	0.0226837	1.07813	SYNGR2
3907111	0.0252531	1.09294	TOMM34
3764399	0.00861805	1.09598	BZRAP1-AS1 RNF43
3799542	0.0305457	1.10348	CEP76
3977299	0.00326334	1.12333	CLCN5 MIR188 PYY3
3473436	0.0128385	1.14155	TESC
3445544	0.0470398	1.14352	PLBD1
2947040	0.0121124	1.14474	HIST1H2AG HIST1H2AH HIST1H2AI HIST1H2AJ HIST1H2AK HIST1H2AL HIST1H2AM
2902844	0.0186028	1.15304	CFB
3945314	0.0282407	1.15576	DDX17 KDELR3
3485074	0.0436732	1.1587	RFC3
3464912	0.0363216	1.16163	POC1B
2423829	0.0140209	1.19382	ARHGAP29
3088486	0.0253122	1.2013	LPL
3394660	4.75449e-05	1.20416	TRIM29
3494102	0.0153392	1.20674	UCHL3
2353283	0.01989	1.21698	VANGL1
3815399	0.000231238	1.22166	CNN2
3720896	0.0496541	1.22379	CDC6
3412345	0.002863	1.23035	TMEM117
2798915	0.0347295	1.23343	BRD9 TRIP13
2791419	0.0377896	1.23894	FAM198B LOC285505
3044129	0.0371664	1.28395	GGCT
3140920	0.0216721	1.31411	GDAP1 JPH1
2679406	0.0175991	1.32007	CADPS
3174510	0.0491935	1.33027	GDA
3300597	0.000892523	1.36154	MYOF
2976360	0.00607994	1.36424	PERP
4017212	0.012994	1.36705	MORC4
3666366	0.00105772	1.39926	CDH3
3247172	0.0215206	1.43883	DKK1
3757108	0.0206559	1.46413	KRT19
3452478	0.0374554	1.47094	AMIGO2
2938972	0.0140524	1.47359	SERPINB1
3040518	0.0194177	1.48882	MACC1 RPL21 RPL21P28 SNORA27 SNORD102
3338192	0.00738823	1.50824	CCND1
3868828	0.00622757	1.54158	KLK10
2974935	0.0370373	1.54911	SLC2A12
3250237	0.0216907	1.59393	HKDC1
3901361	0.0405802	1.61952	CST1 CST2 CST4
3391255	0.027456	1.62431	IL18
2768654	0.038595	1.66456	OCIAD2
3767480	0.000256128	1.67525	AXIN2
2379665	0.00329876	1.68665	PROX1
2841964	0.000333404	1.69122	MSX2 MSX2P1
2377141	0.014347	1.74611	C4BPB
2411173	0.0249957	1.78217	PDZK1IP1
3020343	0.00293269	1.78697	MET
2652675	0.0108715	1.79902	ATP5G1P4 ECT2
2346625	0.000648453	1.80357	EPHX4
3868783	0.00607925	1.89949	KLK7
2647315	0.0375961	1.93001	TM4SF4
3102372	0.0375025	1.95468	SULF1
3137875	0.00804561	2.03715	GGH
3264997	0.0235367	2.05565	PLEKHS1
2997376	0.0354915	2.1533	ANLN
3756591	0.0413383	2.21342	KRT23
2511603	0.0275292	2.37782	ERMN GALNT5
2979246	0.0289315	2.50463	RAET1G RAET1L ULBP2
3455478	0.0383695	2.52064	KRT6A KRT6B KRT6C
2732844	0.0150928	2.82857	ANXA3
2710599	0.00133676	2.88686	CLDN1
2471233	0.0268184	2.9724	VSNL1
3190190	0.004342	3.19632	LCN2
3280573	0.00779128	3.20748	NEBL
3791782	0.000114671	4.1591	SERPINB5
3388673	0.000403871	4.44984	MMP7

## Sheet: Downregulated
Probe Id	p-Value	log(fold_change)	Gene_Symbol
3332424	0.0227575	-4.86843	MS4A12
3655621	0.0228856	-4.32143	ZG16
3648391	0.00818963	-3.41395	GSPT1 LOC100505915 NPIPL3 TNFRSF17
2584113	0.00406786	-2.95675	GCG
2835300	0.013954	-2.53876	SLC26A2 TIGD6
2633191	0.000137174	-2.41793	GPR15
2353988	0.0266363	-2.25125	FAM46C
2429235	0.0148221	-2.23392	AMPD1
2778273	0.0263911	-2.20081	HPGDS
3428225	0.023895	-2.13809	NR1H4
3592755	0.0300554	-2.07658	SEMA6D
2497082	0.031122	-1.96043	IL1RL1
3638607	0.0437701	-1.83075	ANPEP
2891341	0.006928	-1.70864	IRF4
2638676	0.0171204	-1.64818	EAF2 HCG11 IQCB1 LOC647979
3706659	0.0425603	-1.52645	ASPA
2375795	0.0229067	-1.48006	LAX1
3062082	0.00628293	-1.45054	PDK4
3768627	0.0322652	-1.44937	ABCA8
3671076	0.0398914	-1.43251	HSD17B2
3279313	0.0493254	-1.42008	ITGA8
2866225	0.0333527	-1.40156	MEF2C
3969081	0.0191609	-1.33487	PSMA6P2 TLR7
3365203	0.0150315	-1.31427	TPH1
2893895	0.00517084	-1.30456	BMP6
2363202	0.0125184	-1.26795	SLAMF7
3090209	0.0315537	-1.24455	ADAM28
2359352	0.0220694	-1.17254	LCE2B LCE2C LCE2D
3318989	0.0262564	-1.17226	ZNF214 ZNF215
2372812	0.0454082	-1.11233	RGS13
2989537	0.045507	-1.09415	GLCCI1 LOC729852 RPA3
2515707	0.0345297	-1.02289	PDK1
